# Supplementary material
Source: Research Square preprint supplement (doi:10.21203/rs.3.rs-9054246/v1)
Supplement: Supplementary file 1 [file dc52cb5136f4c5108d2c5812.docx]

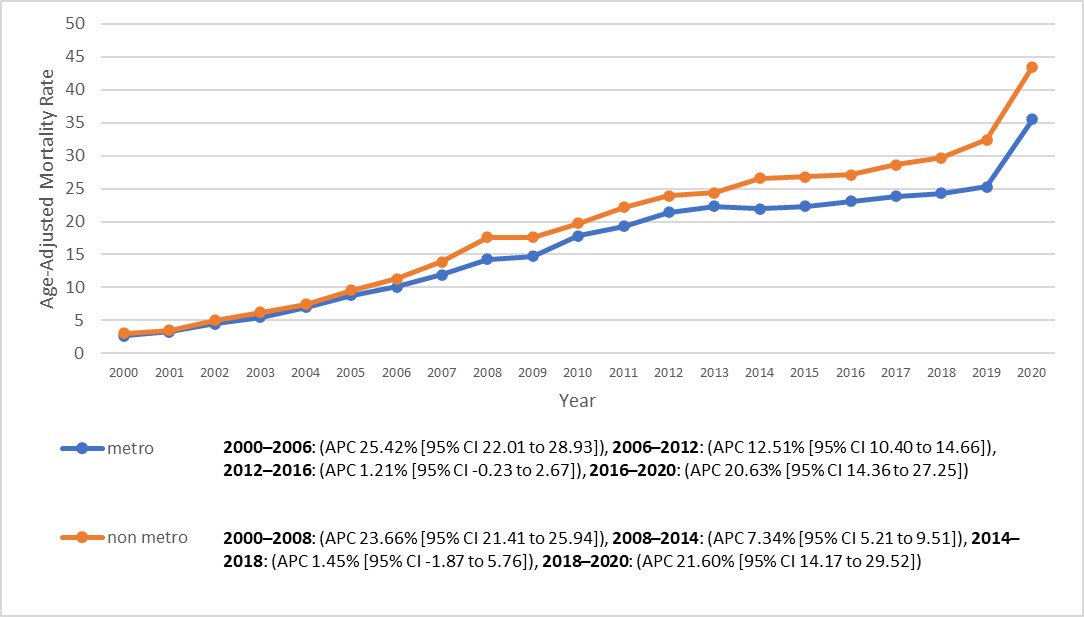


**Supplementary Figure 1.** Trends in Dementia and Hyperlipidemia patients AAMR per 100,000 stratified by Urbanization in the United States from 2000 to 2020.

|  | **Overall** | **Female** | **Male** | **Hispanic or Latino** | **NH**  **American Indian** | **NH**  **Asian** | **NH**  **Black** | **NH White** | **Population** |
| --- | --- | --- | --- | --- | --- | --- | --- | --- | --- |
| **2000** | 962 | 688 | 274 | 23 | N/A | 21 | 52 | 863 | 34991753 |
| **2001** | 1179 | 739 | 440 | 38 | N/A | 31 | 84 | 1025 | 35290291 |
| **2002** | 1630 | 1069 | 561 | 49 | N/A | 28 | 107 | 1437 | 35522207 |
| **2003** | 2038 | 1297 | 741 | 46 | N/A | 38 | 134 | 1813 | 35863529 |
| **2004** | 2600 | 1680 | 920 | 72 | N/A | 64 | 176 | 2279 | 36203319 |
| **2005** | 3358 | 2176 | 1182 | 92 | N/A | 69 | 197 | 2987 | 36649798 |
| **2006** | 3956 | 2557 | 1399 | 142 | 10 | 100 | 275 | 3427 | 37164107 |
| **2007** | 4791 | 3115 | 1676 | 177 | 12 | 128 | 318 | 4151 | 37825711 |
| **2008** | 5916 | 3784 | 2132 | 220 | 18 | 116 | 425 | 5128 | 38777621 |
| **2009** | 6194 | 4006 | 2188 | 232 | 11 | 147 | 466 | 5325 | 39623175 |
| **2010** | 7522 | 4762 | 2760 | 331 | 22 | 187 | 543 | 6433 | 40267984 |
| **2011** | 8447 | 5441 | 3006 | 377 | 33 | 200 | 579 | 7248 | 41394141 |
| **2012** | 9575 | 6128 | 3447 | 454 | 22 | 240 | 652 | 8195 | 43145356 |
| **2013** | 10179 | 6566 | 3613 | 496 | 37 | 246 | 795 | 8590 | 44704074 |
| **2014** | 10434 | 6732 | 3702 | 562 | 33 | 242 | 775 | 8805 | 46243211 |
| **2015** | 10857 | 6948 | 3909 | 549 | 36 | 280 | 853 | 9113 | 47760852 |
| **2016** | 11426 | 7278 | 4148 | 653 | 38 | 305 | 933 | 9482 | 49244195 |
| **2017** | 12109 | 7536 | 4573 | 686 | 34 | 344 | 953 | 10054 | 50858679 |
| **2018** | 12669 | 7996 | 4673 | 725 | 55 | 395 | 1007 | 10471 | 52431193 |
| **2019** | 13547 | 8508 | 5039 | 877 | 43 | 405 | 1079 | 11129 | 54058263 |
| **2020** | 19157 | 11980 | 7177 | 1394 | 77 | 637 | 1751 | 15265 | 55659365 |
| **2021** | 18409 | 11203 | 7206 | 1376 | 67 | 627 | 1666 | 14582 | 55847953 |
| **2022** | 19970 | 12420 | 7550 | 1429 | 43 | 690 | 1752 | 15931 | 57794852 |
| **2023** | 19780 | 12315 | 7465 | 1433 | 58 | 641 | 1787 | 15738 | 59248361 |
| **Total** | 216,705 | 136,924 | 79,781 | 12,433 | 649 | 6,181 | 17,359 | 179,471 | 1,066,569,990 |

**Supplementary Table 1.** Overall and sex stratified Dementia and Hyperlipidemia -Related Mortality in the United States from 2000 to 2023.

| **Year** | **Medical Facility** | **Nursing Home/Long Term Care** | **Hospices** | **Home** | **Other** |
| --- | --- | --- | --- | --- | --- |
| **2000** | 962 | 688 | 274 | 23 | N/A |
| **2001** | 1179 | 739 | 440 | 38 | N/A |
| **2002** | 1630 | 1069 | 561 | 49 | N/A |
| **2003** | 2038 | 1297 | 741 | 46 | N/A |
| **2004** | 2600 | 1680 | 920 | 72 | N/A |
| **2005** | 3358 | 2176 | 1182 | 92 | N/A |
| **2006** | 3956 | 2557 | 1399 | 142 | 10 |
| **2007** | 4791 | 3115 | 1676 | 177 | 12 |
| **2008** | 5916 | 3784 | 2132 | 220 | 18 |
| **2009** | 6194 | 4006 | 2188 | 232 | 11 |
| **2010** | 7522 | 4762 | 2760 | 331 | 22 |
| **2011** | 8447 | 5441 | 3006 | 377 | 33 |
| **2012** | 9575 | 6128 | 3447 | 454 | 22 |
| **2013** | 10179 | 6566 | 3613 | 496 | 37 |
| **2014** | 10434 | 6732 | 3702 | 562 | 33 |
| **2015** | 10857 | 6948 | 3909 | 549 | 36 |
| **2016** | 11426 | 7278 | 4148 | 653 | 38 |
| **2017** | 12109 | 7536 | 4573 | 686 | 34 |
| **2018** | 12669 | 7996 | 4673 | 725 | 55 |
| **2019** | 13547 | 8508 | 5039 | 877 | 43 |
| **2020** | 19157 | 11980 | 7177 | 1394 | 77 |
| **2021** | 18409 | 11203 | 7206 | 1376 | 67 |
| **2022** | 19970 | 12420 | 7550 | 1429 | 43 |
| **2023** | 19780 | 12315 | 7465 | 1433 | 58 |
| **Total** | 216,705 | 136,924 | 79,781 | 12,433 | 649 |

**Supplementary Table 2.** Dementia and Hyperlipidemia -Related Mortality stratified by place of death in the United States from 2000 to 2023

| **Age-Adjusted Rate (95% CI)** | | | |
| --- | --- | --- | --- |
| **Year** | **Overall** | **Female** | **Male** |
| **2000** | 2.78 (2.6–2.95) | 3.12 (2.88–3.35) | 2.14 (1.88–2.4) |
| **2001** | 3.35 (3.16–3.54) | 3.25 (3.01–3.48) | 3.47 (3.14–3.8) |
| **2002** | 4.57 (4.35–4.79) | 4.7 (4.42–4.98) | 4.26 (3.9–4.62) |
| **2003** | 5.59 (5.35–5.84) | 5.59 (5.28–5.89) | 5.56 (5.16–5.97) |
| **2004** | 7.09 (6.82–7.37) | 7.15 (6.81–7.5) | 6.88 (6.43–7.33) |
| **2005** | 8.95 (8.64–9.25) | 9.12 (8.74–9.51) | 8.6 (8.1–9.09) |
| **2006** | 10.34 (10.02–10.67) | 10.51 (10.1–10.92) | 10.03 (9.5–10.56) |
| **2007** | 12.29 (11.94–12.64) | 12.56 (12.11–13) | 11.66 (11.09–12.22) |
| **2008** | 14.88 (14.5–15.26) | 15.01 (14.53–15.5) | 14.54 (13.92–15.16) |
| **2009** | 15.28 (14.9–15.66) | 15.61 (15.12–16.1) | 14.58 (13.96–15.19) |
| **2010** | 18.16 (17.75–18.57) | 18.12 (17.6–18.64) | 18.06 (17.39–18.74) |
| **2011** | 19.74 (19.32–20.16) | 20.21 (19.66–20.76) | 18.92 (18.24–19.6) |
| **2012** | 21.84 (21.4–22.29) | 22.29 (21.72–22.86) | 21.06 (20.36–21.77) |
| **2013** | 22.69 (22.25–23.13) | 23.33 (22.76–23.91) | 21.41 (20.71–22.11) |
| **2014** | 22.77 (22.33–23.21) | 23.48 (22.91–24.05) | 21.28 (20.6–21.97) |
| **2015** | 23.13 (22.69–23.57) | 23.84 (23.27–24.41) | 21.82 (21.13–22.5) |
| **2016** | 23.78 (23.34–24.22) | 24.43 (23.86–25) | 22.54 (21.85–23.23) |
| **2017** | 24.69 (24.25–25.13) | 24.89 (24.32–25.46) | 24.09 (23.39–24.79) |
| **2018** | 25.25 (24.8–25.69) | 25.97 (25.4–26.55) | 23.86 (23.17–24.54) |
| **2019** | 26.45 (26.01–26.9) | 27.22 (26.63–27.8) | 24.99 (24.29–25.68) |
| **2020** | 36.82 (36.3–37.35) | 37.93 (37.24–38.62) | 34.76 (33.95–35.57) |
| **2021** | 37.83 (37.28–38.38) | 38.13 (37.42–38.84) | 36.94 (36.08–37.8) |
| **2022** | 38.06 (37.53–38.59) | 38.88 (38.19–39.56) | 36.56 (35.72–37.39) |
| **2023** | 38.07 (37.54–38.6) | 39.66 (38.95–40.36) | 35.44 (34.63–36.26) |
| **Total** | 19.35 (18.96–19.74) | 19.79 (19.29–20.29) | 18.48 (17.86–19.10) |

**Supplementary Table 3.** Overall and sex stratified Dementia and Hyperlipidemia -Related AAMR per 100,000 in the United States from 2000 to 2023.

|  | **Age-Adjusted Rate (95% CI)** | | | | |
| --- | --- | --- | --- | --- | --- |
| **Year** | **Hispanic** | **NH American Indian** | **NH Asian** | **NH Black** | **NH White** |
| **2000** | 1.65 (1.05–2.48) | Unreliable (3.78–14.5) | 3.37 (2.09–5.16) | 1.99 (1.49–2.61) | 2.87 (2.68–3.07) |
| **2001** | 2.62 (1.84–3.61) | Unreliable (4.66–15.75) | 4.26 (2.88–6.08) | 3.17 (2.53–3.92) | 3.4 (3.19–3.61) |
| **2002** | 3.18 (2.34–4.21) | Unreliable (7.32–20.13) | 3.55 (2.34–5.16) | 4 (3.24–4.76) | 4.69 (4.44–4.93) |
| **2003** | 2.79 (2.03–3.73) | Unreliable (3.45–13.23) | 4.53 (3.19–6.24) | 4.97 (4.12–5.81) | 5.85 (5.58–6.12) |
| **2004** | 4.2 (3.27–5.3) | 14.57 (9.02–22.26) | 7.41 (5.69–9.48) | 6.38 (5.43–7.33) | 7.3 (7-7.6) |
| **2005** | 5.08 (4.08–6.24) | 21.03 (14.47–29.53) | 7.52 (5.84–9.53) | 7.04 (6.05–8.03) | 9.37 (9.04–9.71) |
| **2006** | 7.43 (6.2–8.66) | 13.12 (8.22–19.86) | 10.44 (8.39–12.5) | 9.67 (8.53–10.82) | 10.56 (10.21–10.92) |
| **2007** | 8.63 (7.35–9.91) | 19.54 (13.68–27.05) | 12.57 (10.38–14.75) | 11.05 (9.83–12.26) | 12.6 (12.22–12.99) |
| **2008** | 10.46 (9.07–11.85) | 16.9 (11.56–23.85) | 10.62 (8.68–12.55) | 14.38 (13.01–15.75) | 15.36 (14.94–15.78) |
| **2009** | 10.33 (8.99–11.66) | 16.78 (11.69–23.34) | 12.66 (10.61–14.71) | 15.33 (13.94–16.73) | 15.71 (15.29–16.13) |
| **2010** | 14.04 (12.52–15.56) | 17.06 (12.01–23.52) | 15.25 (13.06–17.44) | 17.41 (15.94–18.88) | 18.64 (18.18–19.1) |
| **2011** | 14.64 (13.16–16.12) | 14.85 (10.28–20.75) | 14.78 (12.73–16.83) | 17.99 (16.52–19.46) | 20.48 (20.01–20.96) |
| **2012** | 16.7 (15.16–18.24) | 21.99 (16.52–28.69) | 16.41 (14.33–18.49) | 19.43 (17.93–20.92) | 22.73 (22.23–23.23) |
| **2013** | 16.96 (15.46–18.46) | 16.72 (12.1–22.52) | 15.5 (13.56–17.44) | 22.93 (21.33–24.53) | 23.4 (22.9–23.9) |
| **2014** | 18.03 (16.54–19.53) | 27.08 (21.3–33.94) | 14.05 (12.28–15.82) | 21.64 (20.11–23.17) | 23.65 (23.15–24.14) |
| **2015** | 16.37 (14.99–17.74) | 25.2 (19.45–32.12) | 15.04 (13.27–16.81) | 22.83 (21.29–24.37) | 24.11 (23.61–24.61) |
| **2016** | 18.42 (17–19.84) | 14.8 (10.67–20.01) | 15.44 (13.7–17.18) | 24.23 (22.67–25.8) | 24.64 (24.14–25.14) |
| **2017** | 18.37 (16.99–19.75) | 19.36 (14.66–25.08) | 15.98 (14.28–17.67) | 23.85 (22.32–25.37) | 25.74 (25.23–26.24) |
| **2018** | 18.59 (17.23–19.95) | Unreliable (3.78–14.5) | 17.51 (15.77–19.24) | 24.31 (22.8–25.83) | 26.39 (25.88–26.9) |
| **2019** | 21.52 (20.09–22.95) | Unreliable (4.66–15.75) | 16.87 (15.22–18.52) | 25.37 (23.84–26.89) | 27.68 (27.16–28.2) |
| **2020** | 32.76 (31.03–34.49) | Unreliable (7.32–20.13) | 25.05 (23.09–27) | 39.7 (37.83–41.57) | 37.55 (36.96–38.15) |
| **2021** | 33.04 (31.28–34.79) | Unreliable (3.45–13.23) | 26.31 (24.24–28.37) | 39.81 (37.88–41.74) | 39.04 (38.4–39.67) |
| **2022** | 32.13 (30.45–33.8) | 14.57 (9.02–22.26) | 26.23 (24.26–28.19) | 40.08 (38.19–41.98) | 39.57 (38.95–40.18) |
| **2023** | 31.67 (30.02–33.32) | 21.03 (14.47–29.53) | 23.72 (21.88–25.55) | 40.39 (38.5–42.29) | 39.8 (39.18–40.42) |
| **Total** | 14.98 (13.67–16.34) | 18.50 (11.38–23.12) | 13.96 (12.16–15.86) | 19.08 (17.72–20.45) | 20.05 (19.61–20.49) |

**Supplementary Table 4.** Dementia and Hyperlipidemia -Related AMMR per 100,000 stratified by race in the United States from 2000 to 2023.

| **Age-Adjusted Rate (95% CI)** | | |
| --- | --- | --- |
| **Year** | **Metropolitan** | **Nonmetropolitan** |
| **2000** | 2.69 (2.5–2.89) | 3.08 (2.66–3.5) |
| **2001** | 3.28 (3.07–3.49) | 3.52 (3.08–3.97) |
| **2002** | 4.46 (4.21–4.7) | 5.06 (4.52–5.59) |
| **2003** | 5.47 (5.21–5.74) | 6.22 (5.63–6.81) |
| **2004** | 7 (6.7–7.3) | 7.43 (6.79–8.08) |
| **2005** | 8.81 (8.48–9.15) | 9.59 (8.86–10.32) |
| **2006** | 10.13 (9.77–10.48) | 11.34 (10.55–12.12) |
| **2007** | 11.93 (11.55–12.31) | 13.93 (13.07–14.8) |
| **2008** | 14.26 (13.85–14.67) | 17.6 (16.63–18.56) |
| **2009** | 14.74 (14.33–15.16) | 17.61 (16.64–18.57) |
| **2010** | 17.85 (17.4–18.3) | 19.77 (18.75–20.78) |
| **2011** | 19.27 (18.81–19.73) | 22.13 (21.07–23.19) |
| **2012** | 21.41 (20.93–21.89) | 23.91 (22.81–25.01) |
| **2013** | 22.34 (21.86–22.83) | 24.38 (23.28–25.48) |
| **2014** | 21.96 (21.48–22.43) | 26.59 (25.45–27.73) |
| **2015** | 22.35 (21.88–22.83) | 26.76 (25.62–27.9) |
| **2016** | 23.1 (22.62–23.57) | 27.1 (25.97–28.23) |
| **2017** | 23.85 (23.37–24.33) | 28.58 (27.43–29.73) |
| **2018** | 24.29 (23.82–24.77) | 29.69 (28.52–30.85) |
| **2019** | 25.25 (24.77–25.73) | 32.4 (31.19–33.61) |
| **2020** | 35.51 (34.95–36.07) | 43.44 (42.05–44.83) |

**Supplementary Table 5.** Dementia and Hyperlipidemia -Related AAMR per 100,000 stratified by urban-rural classification in the United States from 2000 to 2020.

| **State** | **Age-Adjusted Rate (95% CI)** |
| --- | --- |
| **Alabama** | 10.96 (10.4–11.53) |
| **Alaska** | 14.08 (11.63–16.54) |
| **Arizona** | 9.66 (9.21–10.11) |
| **Arkansas** | 14.02 (13.23–14.8) |
| **California** | 21.42 (21.12–21.71) |
| **Colorado** | 19.36 (18.55–20.16) |
| **Connecticut** | 12.26 (11.64–12.89) |
| **Delaware** | 18.71 (17.07–20.35) |
| **District of** **Columbia** | 13.34 (11.57–15.12) |
| **Florida** | 9.7 (9.48–9.93) |
| **Georgia** | 9.6 (9.18–10.03) |
| **Hawaii** | 30.38 (28.81–31.96) |
| **Idaho** | 15.15 (13.96–16.35) |
| **Illinois** | 12.01 (11.65–12.37) |
| **Indiana** | 22.86 (22.17–23.55) |
| **Iowa** | 23.7 (22.79–24.61) |
| **Kansas** | 12.45 (11.72–13.19) |
| **Kentucky** | 20.23 (19.42–21.05) |
| **Louisiana** | 14.48 (13.78–15.17) |
| **Maine** | 18.57 (17.32–19.81) |
| **Maryland** | 26.78 (25.96–27.59) |
| **Massachusetts** | 9.25 (8.84–9.66) |
| **Michigan** | 10.75 (10.38–11.12) |
| **Minnesota** | 26.43 (25.63–27.23) |
| **Mississippi** | 13.72 (12.9–14.54) |
| **Missouri** | 14.24 (13.69–14.78) |
| **Montana** | 20.11 (18.55–21.67) |
| **Nebraska** | 32.72 (31.25–34.19) |
| **Nevada** | 7.28 (6.58–7.97) |
| **New Hampshire** | 20.84 (19.42–22.26) |
| **New Jersey** | 17.82 (17.32–18.32) |
| **New Mexico** | 11.77 (10.86–12.67) |
| **New York** | 11.66 (11.39–11.93) |
| **North Carolina** | 19.95 (19.4–20.5) |
| **North Dakota** | 28.9 (26.76–31.05) |
| **Ohio** | 27.96 (27.41–28.5) |
| **Oklahoma** | 22.78 (21.87–23.69) |
| **Oregon** | 29.26 (28.28–30.23) |
| **Pennsylvania** | 17.57 (17.19–17.95) |
| **Rhode Island** | 25.3 (23.71–26.89) |
| **South Carolina** | 25.73 (24.83–26.62) |
| **South Dakota** | 19.53 (17.91–21.15) |
| **Tennessee** | 19.62 (18.95–20.28) |
| **Texas** | 25.52 (25.09–25.95) |
| **Utah** | 9.65 (8.8–10.49) |
| **Vermont** | 50.48 (47.36–53.59) |
| **Virginia** | 17.28 (16.71–17.85) |
| **Washington** | 24.12 (23.4–24.83) |
| **West Virginia** | 25.51 (24.25–26.78) |
| **Wisconsin** | 16.79 (16.19–17.39) |
| **Wyoming** | 19.73 (17.45–22.02) |

**Supplementary Table 6.**  Dementia and Hyperlipidemia-Related per 100,000 stratified by state in the United States from 2000 to 2020.

| Census Region | Year | Age-Adjusted Rate (95%CI) |
| --- | --- | --- |
| Census Region 1: Northeast | 2000 | 2.03 (1.71–2.35) |
| Census Region 1: Northeast | 2001 | 2.04 (1.72–2.36) |
| Census Region 1: Northeast | 2002 | 2.99 (2.6–3.38) |
| Census Region 1: Northeast | 2003 | 3.66 (3.24–4.09) |
| Census Region 1: Northeast | 2004 | 5.39 (4.88–5.9) |
| Census Region 1: Northeast | 2005 | 6.23 (5.68–6.78) |
| Census Region 1: Northeast | 2006 | 7.61 (7.01–8.21) |
| Census Region 1: Northeast | 2007 | 9.08 (8.42–9.73) |
| Census Region 1: Northeast | 2008 | 10.95 (10.24–11.66) |
| Census Region 1: Northeast | 2009 | 11.63 (10.91–12.36) |
| Census Region 1: Northeast | 2010 | 15.16 (14.34–15.99) |
| Census Region 1: Northeast | 2011 | 16.8 (15.93–17.66) |
| Census Region 1: Northeast | 2012 | 18.36 (17.46–19.25) |
| Census Region 1: Northeast | 2013 | 19.24 (18.33–20.15) |
| Census Region 1: Northeast | 2014 | 20.02 (19.1–20.94) |
| Census Region 1: Northeast | 2015 | 20.79 (19.86–21.73) |
| Census Region 1: Northeast | 2016 | 21.2 (20.26–22.14) |
| Census Region 1: Northeast | 2017 | 21.56 (20.63–22.49) |
| Census Region 1: Northeast | 2018 | 22.93 (21.97–23.88) |
| Census Region 1: Northeast | 2019 | 23.8 (22.84–24.77) |
| Census Region 1: Northeast | 2020 | 36.55 (35.36–37.74) |
| Census Region 1: Northeast | 2021 | 32.73 (31.58–33.88) |
| Census Region 1: Northeast | 2022 | 34.62 (33.47–35.77) |
| Census Region 1: Northeast | 2023 | 34.32 (33.17–35.47) |
| Total |  | 16.65 (15.86–17.45) |
| Census Region 2: Midwest | 2000 | 3.17 (2.79–3.55) |
| Census Region 2: Midwest | 2001 | 4.04 (3.62–4.47) |
| Census Region 2: Midwest | 2002 | 5.04 (4.56–5.51) |
| Census Region 2: Midwest | 2003 | 6.14 (5.62–6.66) |
| Census Region 2: Midwest | 2004 | 8.07 (7.48–8.67) |
| Census Region 2: Midwest | 2005 | 10.3 (9.63–10.97) |
| Census Region 2: Midwest | 2006 | 11.83 (11.12–12.53) |
| Census Region 2: Midwest | 2007 | 14.03 (13.26–14.79) |
| Census Region 2: Midwest | 2008 | 17.27 (16.43–18.12) |
| Census Region 2: Midwest | 2009 | 16.99 (16.15–17.82) |
| Census Region 2: Midwest | 2010 | 19.3 (18.42–20.19) |
| Census Region 2: Midwest | 2011 | 21 (20.09–21.91) |
| Census Region 2: Midwest | 2012 | 24.52 (23.54–25.49) |
| Census Region 2: Midwest | 2013 | 25.27 (24.28–26.25) |
| Census Region 2: Midwest | 2014 | 24.54 (23.58–25.5) |
| Census Region 2: Midwest | 2015 | 25.2 (24.23–26.17) |
| Census Region 2: Midwest | 2016 | 25.99 (25.02–26.97) |
| Census Region 2: Midwest | 2017 | 27.05 (26.07–28.04) |
| Census Region 2: Midwest | 2018 | 26.95 (25.98–27.93) |
| Census Region 2: Midwest | 2019 | 27.31 (26.34–28.28) |
| Census Region 2: Midwest | 2020 | 36.99 (35.86–38.12) |
| Census Region 2: Midwest | 2021 | 35.73 (34.58–36.88) |
| Census Region 2: Midwest | 2022 | 34.53 (33.44–35.62) |
| Census Region 2: Midwest | 2023 | 33.83 (32.74–34.92) |
| Total |  | 20.21 (19.37–21.06) |
| Census Region 3: South | 2000 | 2.71 (2.41–3) |
| Census Region 3: South | 2001 | 3.18 (2.86–3.49) |
| Census Region 3: South | 2002 | 4.71 (4.33–5.09) |
| Census Region 3: South | 2003 | 5.65 (5.23–6.07) |
| Census Region 3: South | 2004 | 6.62 (6.17–7.07) |
| Census Region 3: South | 2005 | 8.83 (8.32–9.35) |
| Census Region 3: South | 2006 | 9.59 (9.06–10.12) |
| Census Region 3: South | 2007 | 11.65 (11.07–12.23) |
| Census Region 3: South | 2008 | 14.03 (13.4–14.66) |
| Census Region 3: South | 2009 | 14.87 (14.23–15.5) |
| Census Region 3: South | 2010 | 17.74 (17.05–18.42) |
| Census Region 3: South | 2011 | 18.84 (18.14–19.54) |
| Census Region 3: South | 2012 | 20.3 (19.58–21.01) |
| Census Region 3: South | 2013 | 21.33 (20.61–22.06) |
| Census Region 3: South | 2014 | 21.68 (20.96–22.4) |
| Census Region 3: South | 2015 | 22.09 (21.37–22.8) |
| Census Region 3: South | 2016 | 22.13 (21.43–22.84) |
| Census Region 3: South | 2017 | 23.82 (23.09–24.54) |
| Census Region 3: South | 2018 | 24.71 (23.99–25.44) |
| Census Region 3: South | 2019 | 26.88 (26.14–27.63) |
| Census Region 3: South | 2020 | 37.68 (36.81–38.55) |
| Census Region 3: South | 2021 | 40.21 (39.28–41.14) |
| Census Region 3: South | 2022 | 41.48 (40.57–42.39) |
| Census Region 3: South | 2023 | 42.16 (41.24–43.07) |
| Total |  | 19.29 (18.64–19.93) |
| Census Region 4: West | 2000 | 3.11 (2.69–3.53) |
| Census Region 4: West | 2001 | 4.23 (3.75–4.72) |
| Census Region 4: West | 2002 | 5.45 (4.91–6) |
| Census Region 4: West | 2003 | 7.06 (6.45–7.67) |
| Census Region 4: West | 2004 | 8.48 (7.82–9.15) |
| Census Region 4: West | 2005 | 10.55 (9.82–11.28) |
| Census Region 4: West | 2006 | 12.75 (11.95–13.54) |
| Census Region 4: West | 2007 | 14.71 (13.87–15.56) |
| Census Region 4: West | 2008 | 17.44 (16.54–18.35) |
| Census Region 4: West | 2009 | 17.55 (16.66–18.45) |
| Census Region 4: West | 2010 | 20.6 (19.64–21.56) |
| Census Region 4: West | 2011 | 22.89 (21.89–23.88) |
| Census Region 4: West | 2012 | 24.91 (23.89–25.93) |
| Census Region 4: West | 2013 | 25.53 (24.51–26.54) |
| Census Region 4: West | 2014 | 25.09 (24.09–26.08) |
| Census Region 4: West | 2015 | 24.77 (23.79–25.74) |
| Census Region 4: West | 2016 | 26.54 (25.55–27.53) |
| Census Region 4: West | 2017 | 26.39 (25.41–27.37) |
| Census Region 4: West | 2018 | 26.31 (25.35–27.28) |
| Census Region 4: West | 2019 | 27.08 (26.12–28.05) |
| Census Region 4: West | 2020 | 35.3 (34.21–36.39) |
| Census Region 4: West | 2021 | 40.22 (39.02–41.43) |
| Census Region 4: West | 2022 | 38.68 (37.55–39.81) |
| Census Region 4: West | 2023 | 38.29 (37.16–39.42) |
| Total |  | 20.99 (20.11–21.89) |

**Supplementary Table 7.** Dementia and Hyperlipidemia-Related MortalityAAMR per 100,000 stratified by census region in the United States from 2000 to 2023.

| **Interval of years** | **APC(95% CI)** |
| --- | --- |
| **Overall** |  |
| 2000-2007 | 23.59 (21.04-26.20) |
| 2007-2012 | 11.19 (8.33-14.12) |
| 2012-2018 | 2.11 (0.60-3.64) |
| 2018-2021 | 16.30 (10.03-22.92) |
| 2021-2023 | -1.63 (-6.32-3.30) |
| **Male** |  |
| 2000-2005 | 29.18 (21.32-37.55) |
| 2005-2011 | 14.36 (10.80-18.05) |
| 2011-2018 | 2.40 (0.68-4.15) |
| 2018-2021 | 16.89 (7.81-26.74) |
| 2021-2023 | -3.23 (-10.03-4.09) |
| **Female** |  |
| 2000-2007 | 23.21 (20.66-25.80) |
| 2007-2012 | 11.52 (8.59-14.53) |
| 2012-2018 | 2.19 (0.68-3.72) |
| 2018-2021 | 15.78 (9.46-22.46) |
| 2021-2023 | -0.48 (-5.32-4.62) |
| **Asian or Pacific Islander** |  |
| 2000-2007 | 23.55 (14.51-33.31) |
| 2007-2018 | 2.42 (0.38-4.50) |
| 2018-2021 | 18.03 (-0.28-39.70) |
| 2021-2023 | -6.11 (-18.80-8.57) |
| **Black or African American** |  |
| 2000-2008 | 24.24 (13.97-35.44) |
| 2008-2023 | 7.46 (6.10-8.83) |
| **White** |  |
| 2000-2006 | 25.62 (22.45-28.86) |
| 2006-2012 | 12.35 (10.35-14.38) |
| 2012-2018 | 2.04 (0.63-3.47) |
| 2018-2021 | 15.77 (9.89-21.96) |
| 2021-2023 | -0.64 (-5.18-4.12) |
| **Hispanic or Latino** |  |
| 2000-2010 | 22.45 (18.29-26.76) |
| 2010-2018 | 3.34 (1.01-5.72) |
| 2018-2021 | 22.11 (8.52-37.40) |
| 2021-2023 | -5.56 (-14.73-4.60) |
| **Metropolitan** |  |
| 2000-2006 | 25.42 (22.01-28.93) |
| 2006-2012 | 12.51 (10.40-14.66) |
| 2012-2018 | 1.21 (-0.23-2.67) |
| 2018-2020 | 20.63 (14.36-27.25) |
| **Non-Metropolitan** |  |
| 2000-2008 | 23.66 (21.41-25.94) |
| 2008-2014 | 7.34 (5.21-9.51) |
| 2014-2018 | 1.87 (-1.87-5.76) |
| 2018-2020 | 21.60 (14.17-29.51) |
| **Northeast** |  |
| 2000-2010 | 21.29 (15.33-27.55) |
| 2010-2023 | 6.86 (5.38-8.36) |
| **Midwest** |  |
| 2000-2008 | 23.68 (17.62-30.04) |
| 2008-2023 | 4.81 (3.86-5.78) |
| **South** |  |
| 2000-2010 | 19.08 (16.85-21.34) |
| 2010-2018 | 3.31 (1.67-4.98) |
| 2018-2021 | 19.47 (9.10-30.82) |
| 2021-2023 | 0.55 (-6.98-8.69) |
| **West** |  |
| 2000-2006 | 25.64 (21.57-29.83) |
| 2006-2012 | 11.27 (8.80-13.80) |
| 2012-2018 | 0.31 (-1.41-2.07) |
| 2018-2021 | 15.68 (8.21-23.66) |
| 2021-2023 | -2.13 (-7.79-3.88) |

**Supplementary Table 8**. Summary APCs of per 100,000 in the United States from 2000 to 2023. (Crude Rate was used in place of Age-Adjusted Mortality Rate)
